# Supplementary material for: Impact of urbanization on functional diversity in macromycete communities along an urban ecosystem in Southwest Mexico
Source: PeerJ. 2021 Sep 21;9:e12191. doi: 10.7717/peerj.12191 (PMC8462387; doi:10.7717/peerj.12191)
Supplement: Supplemental Information 6 [file peerj-09-12191-s006.xlsx]

## Sheet: arbolOK
Microclimatic, environmental, and vegetation structure variables recorded in each plot of every study site in Southwest Mexico.
Sites	Plots	Slope (°)	Aspect (°)	Stoniness cover (%)	Litter depth (cm)	Soil cover (%)	Air temperature (°C)	Soil temperature (°C)	Air humidity (%)	Soil humidity (%)	Mean heigth of trees (m)	Basal area (m2)	Tree density (ind/ha)
1	1	180	27	6	94	0	20.575	16.2963	72.275	31.4631	17.6667	42.9593	100
1	2	170	30	0	100	0	19.9417	16.4815	73.475	29.3682	6.68571	97.6847	70
1	3	175	27	2	96	2	20.9917	16.6667	69.8167	28.055	13.525	17.6591	60
1	4	190	20	5	95	0	21.5667	17.1296	65.8917	24.325	17.6357	65.5272	90
1	5	183.077	20.9231	8	92	0	21.5417	16.6667	62.0667	40.041	9.83333	20.3516	60
1	6	165	23	8	76	16	21.6167	16.6667	59.65	22.1969	9.32727	38.3277	110
1	7	183	21	4	96	0	20.8333	16.7593	65.4083	33.0698	13.2167	51.9033	70
1	8	190	24	12	86	2	21.125	19.1667	61.2583	32.8488	19.5	39.1835	30
1	9	192	25	64	36	0	20.1833	16.7593	67.8667	29.1005	8.96	20.3274	100
1	10	210	27	11	89	0	21.3	17.2222	68.2167	25.1932	8.75556	27.8797	90
2	1	21	67	8	89	3	25.6167	19.537	51.6417	9.85644	10.2167	30.0199	50
2	2	21	130	8	78	14	25.1667	20	52.4583	8.65229	5.58571	14.4995	70
2	3	21	8	5	84	11	24.0333	19.1667	55.275	6.55603	8.82	31.2831	60
2	4	21	110	6	72	22	24.5583	18.0556	57.2083	9.17739	6.94	37.5518	50
2	5	15	90	6	75	19	25.1167	18.0556	54.1583	10.8138	8.16667	17.3907	30
2	6	22	52	11	69	20	26.8167	20.0926	48.4167	4.96371	7.125	12.3601	40
2	7	19	114	8	62	30	25.2417	20.9259	49.725	9.86604	10.375	28.3902	60
2	8	14	54	6	93	1	25.3083	18.9815	51.15	6.48108	5.3125	14.0606	80
2	9	22	115	7	75	18	25.8083	20.5556	53.1333	7.28733	6	20.3104	30
2	10	19	149	7	90	3	25.4167	18.9815	51.825	10.4656	5.7	51.3081	60
3	1	10	23	41	25	34	23.4417	19.4444	61.725	6.9028	4.375	35.8259	40
3	2	25	23	26	71	3	24.5083	20.5556	61.375	3.22765	5.05	33.8871	120
3	3	15	23	30	63	7	24.1833	20.2778	62.425	16.196	3.68	42.9944	100
3	4	20	20	38	50	12	25.3833	21.3889	61.5417	3.4967	6.5	34.2119	10
3	5	20	21	45	30	25	23.9417	20.0926	62.0083	13.0832	4.56	79.2403	50
3	6	15	24	25	71	4	24.7083	19.0741	65.425	13.8404	6.03333	165.82	30
3	7	15	21	26	46	28	25.2167	19.9074	60.0333	14.8632	2.35	13.4558	40
3	8	15	22	26	72	2	25.0833	20.2778	60.0583	2.06057	4.5	41.3584	50
3	9	25	21	11	69	20	25.5417	21.0185	61.3583	2.98882	3.46667	19.4703	60
3	10	35	20	35	53	12	26.8667	19.9074	56.5917	5.87874	3	48.6135	30
4	1	36	0	7	66	27	24.4333	19.9074	61.325	3.33158	9.51176	25.5026	180
4	2	34	5	4	80	16	24.625	19.6296	60.7	6.46229	11.8647	15.2632	180
4	3	33	5	7	76	17	24.1083	19.3519	61.7333	6.71379	18.0125	25.8737	190
4	4	36	15	9	77	14	25.6333	20.5556	53.1167	10.5048	4.49231	17.7762	130
4	5	37	22	1	88	11	26.25	20.1852	55.825	3.00546	4.31667	14.5393	180
4	6	46	50	7	83	10	25.8583	20.3704	57.85	5.09801	3.76429	33.3383	140
4	7	24	5	9	60	31	25.875	20.5556	57.225	10.4485	9.19048	18.0034	220
4	8	34	50	10	76	14	26.0583	21.1111	53.0667	7.78346	8.352	19.2599	260
4	9	38	35	17	65	18	25.6917	20.8333	56.3167	9.09695	9.6381	13.8496	220
4	10	25	70	20	67	13	26.2333	21.3889	56.0583	4.56934	7.39375	17.5335	170
